# Supplementary material for: Gelatin methacryloyl (GelMA) loaded with concentrated hypoxic pretreated adipose-derived mesenchymal stem cells(ADSCs) conditioned medium promotes wound healing and vascular regeneration in aged skin
Source: PubMed Central journal article supplement (PMC9926638; doi:10.1186/s40824-023-00352-3), 2023-02-13
Supplement: 40824_2023_352_MOESM1_ESM.pdf [file 40824_2023_352_MOESM1_ESM.pdf]

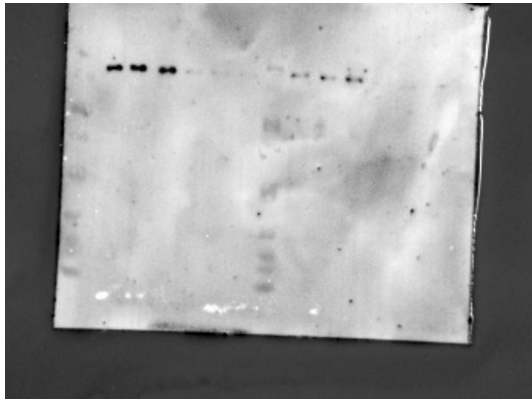

HIF1 $\alpha$

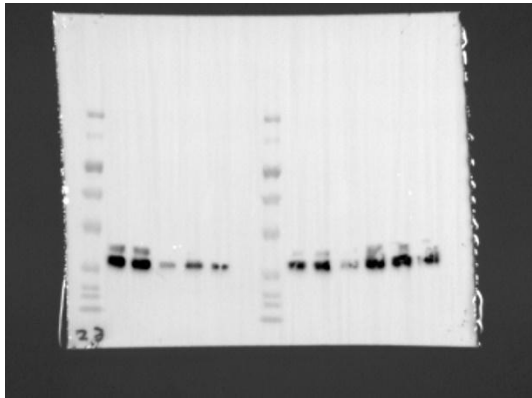

VEGF

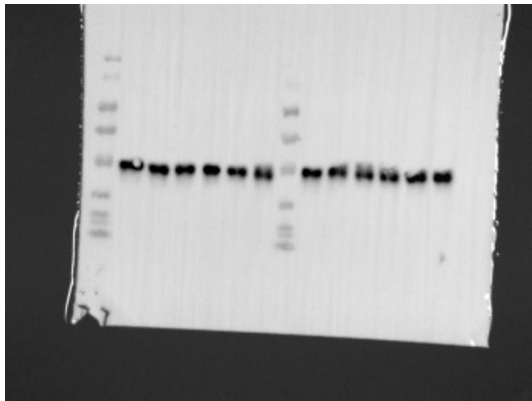

$\beta$ -actin

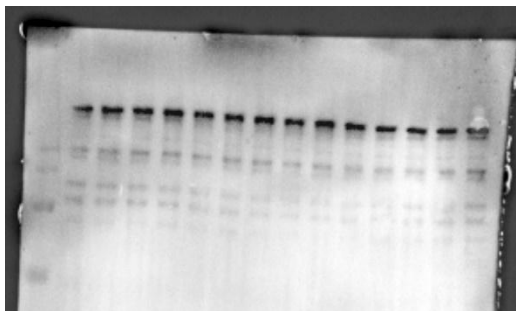

mTOR

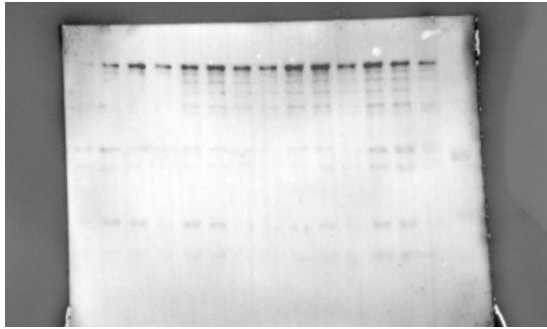

p-mTOR

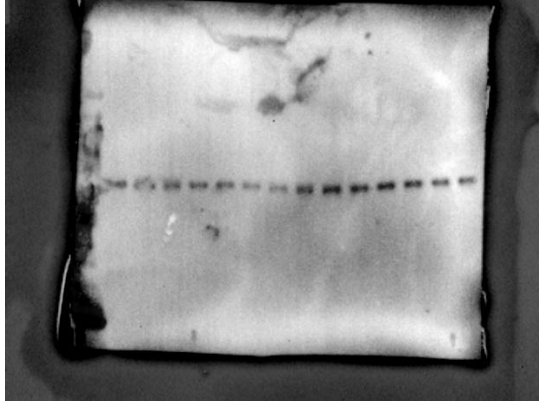

Akt

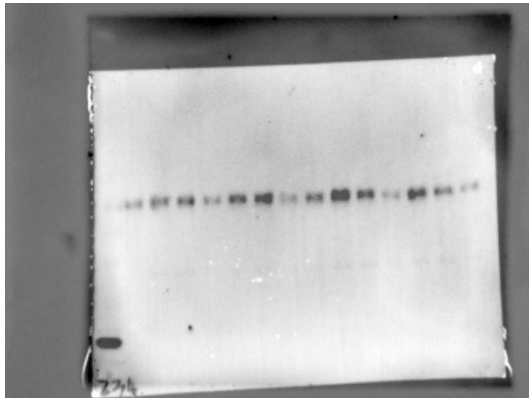

p-Akt

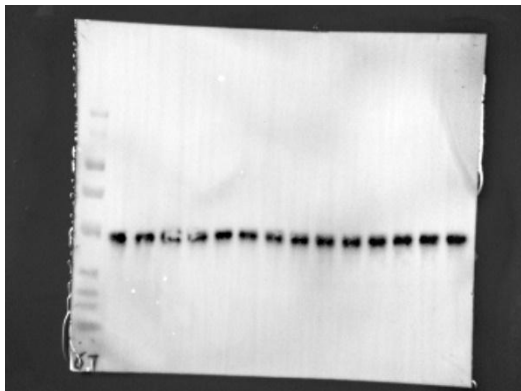

MEK

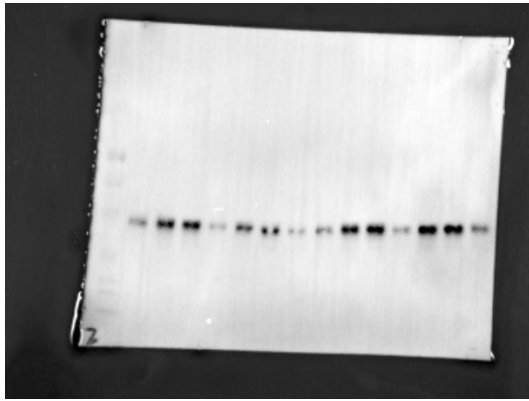

p-MEK

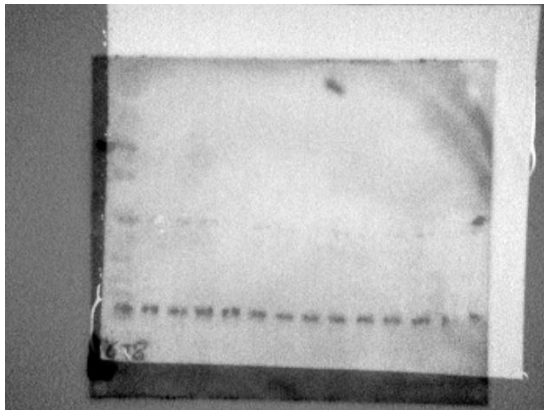

Erk

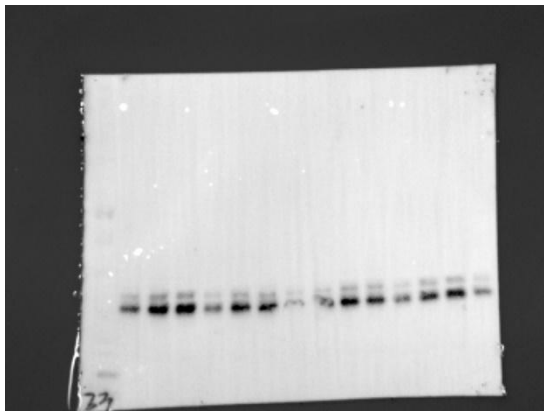

p-ERK

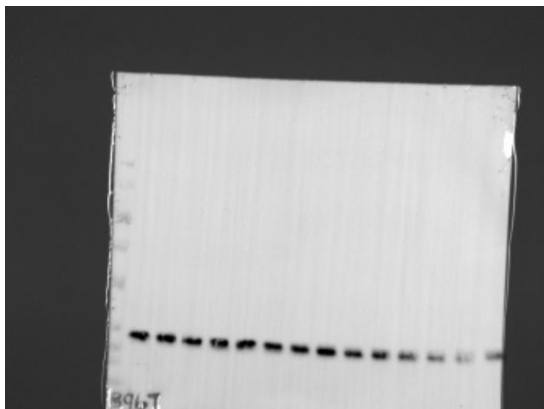

Gapdh
